# Supplementary material for: Thiolactone-maleimide: a functional monomer to synthesize fluorescent aliphatic poly(amide-imide) with excellent solubility via in situ PEGylation
Source: Royal Society of Chemistry journal article supplement (doi:10.1039/c6py01344a), 2016-01-01
Supplement: c6py01344a1.pdf [file c6py01344a1.pdf]

## Supporting Information

### Thiolactone-Maleimide: A Functional Monomer to Synthesize Fluorescent Aliphatic Poly(amide-imide) with Excellent Solubility via In Situ PEGylation

Jun-Jie Yan,<sup>\*,†</sup> Rong-Rong Wang,<sup>†</sup> Dong-Hui Pan,<sup>†</sup> Run-Lin Yang,<sup>†</sup> Yu-Ping Xu,<sup>†</sup> Li-Zhen Wang,<sup>†</sup> Min Yang<sup>\*,†</sup>

<sup>†</sup>*Molecular Imaging Center, Key Laboratory of Nuclear Medicine, Ministry of Health, Jiangsu Key Laboratory of Molecular Nuclear Medicine, Jiangsu Institute of Nuclear Medicine, Wuxi 214063, Jiangsu, China*

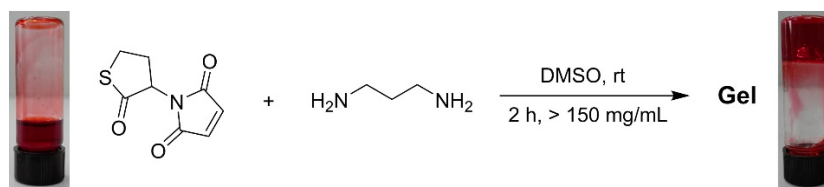

**Figure S1.** Gel formation during the reaction between thiolactone-maleimide (without a linker) and 1,3-diaminopropane in DMSO.

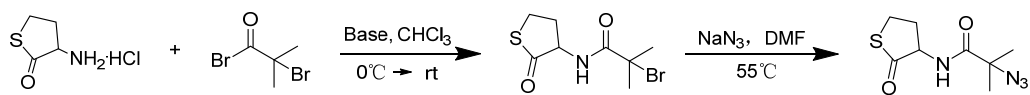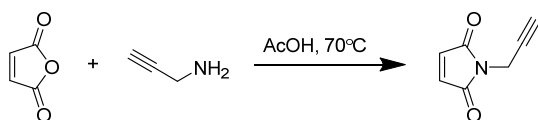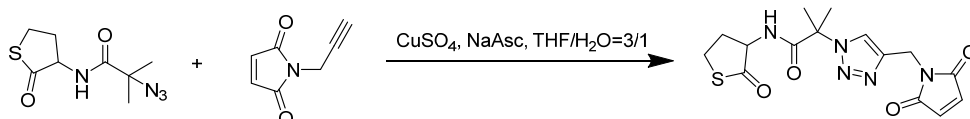

**Scheme S1.** Synthesis of Thiolactone-Maleimide Functional Monomer.

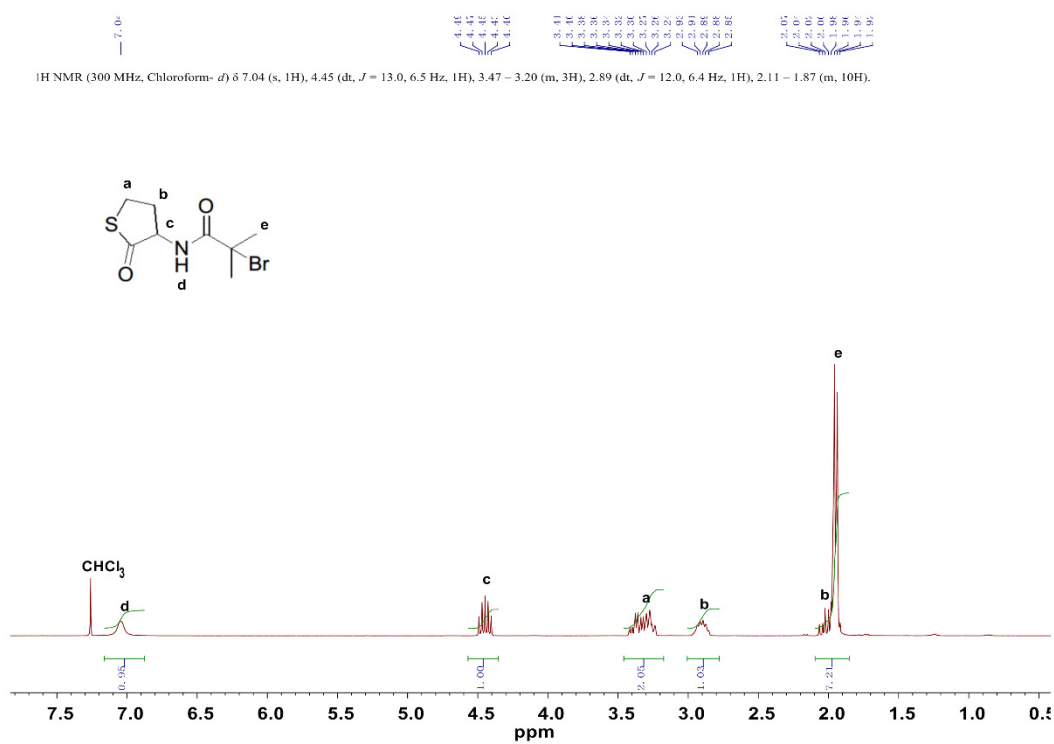

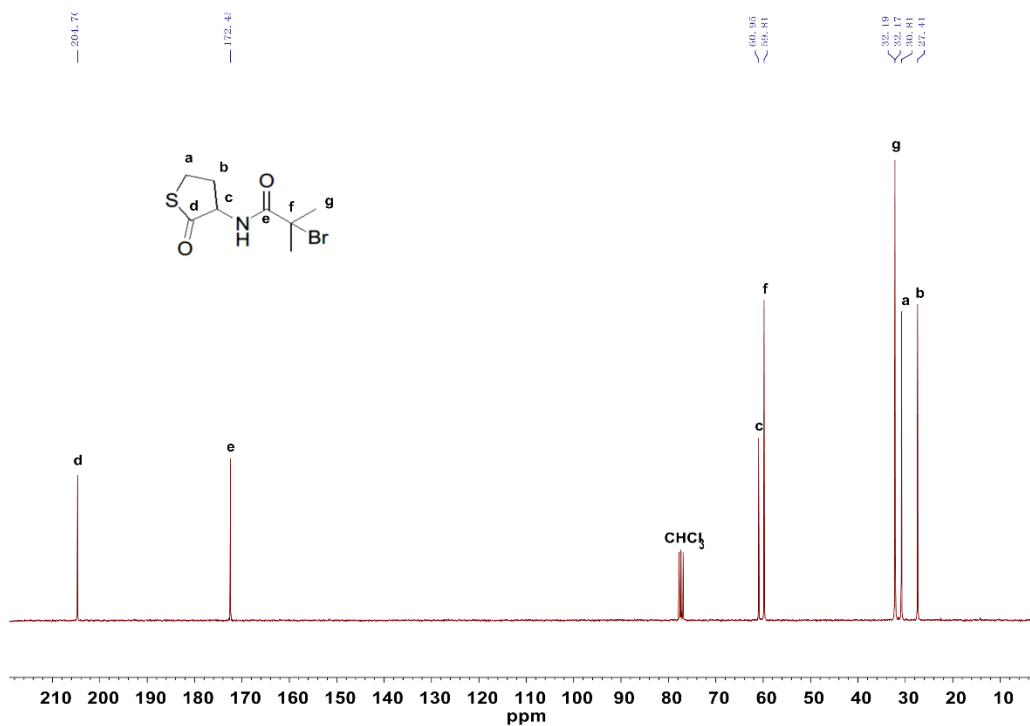

**Figure S2.** <sup>1</sup>H and <sup>13</sup>C NMR spectra of bromo-functionalized thiolactones in CDCl<sub>3</sub>.

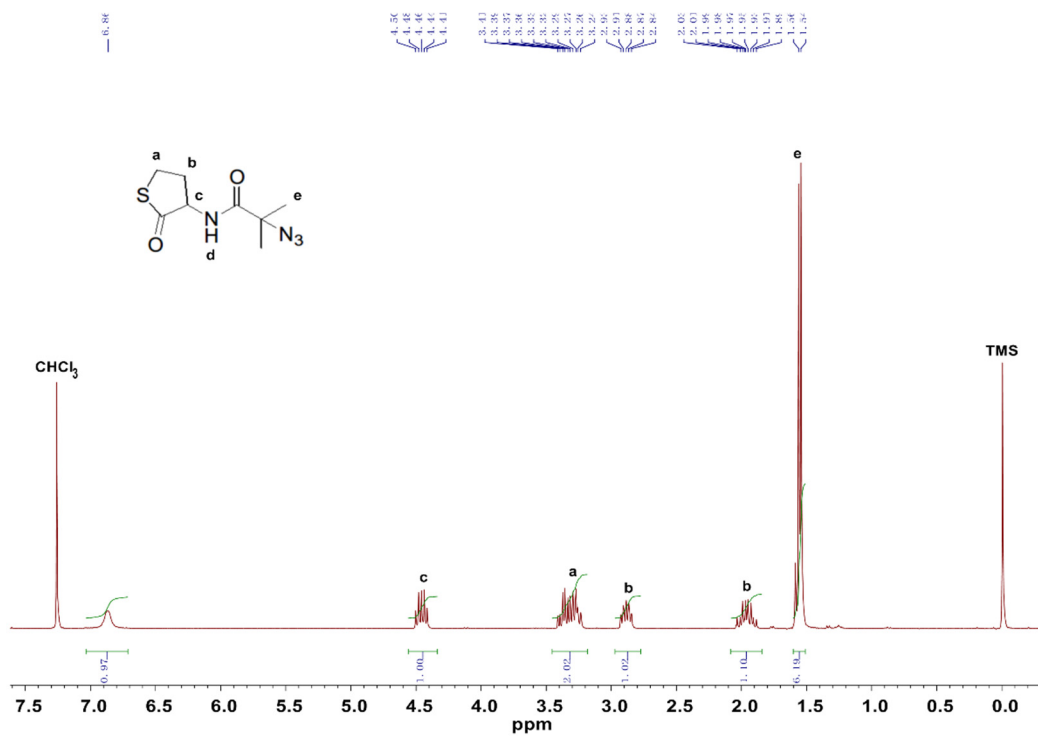

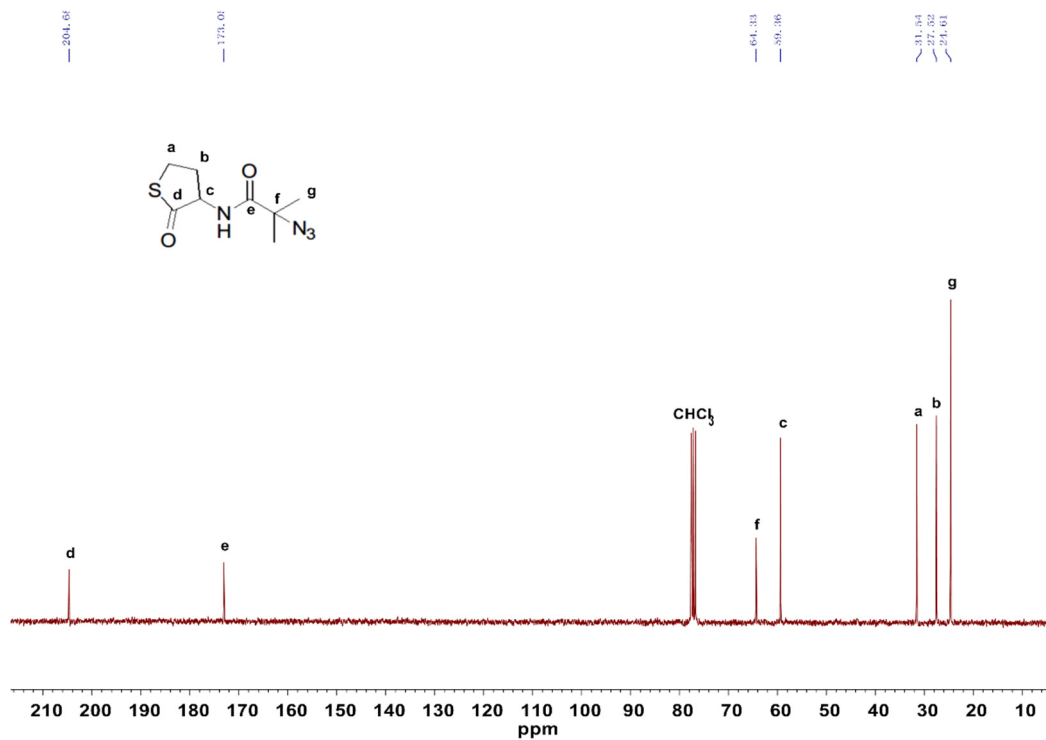

**Figure S3.**  $^1\text{H}$  and  $^{13}\text{C}$  NMR spectra of azide-functionalized thiolactones in  $\text{CDCl}_3$ .

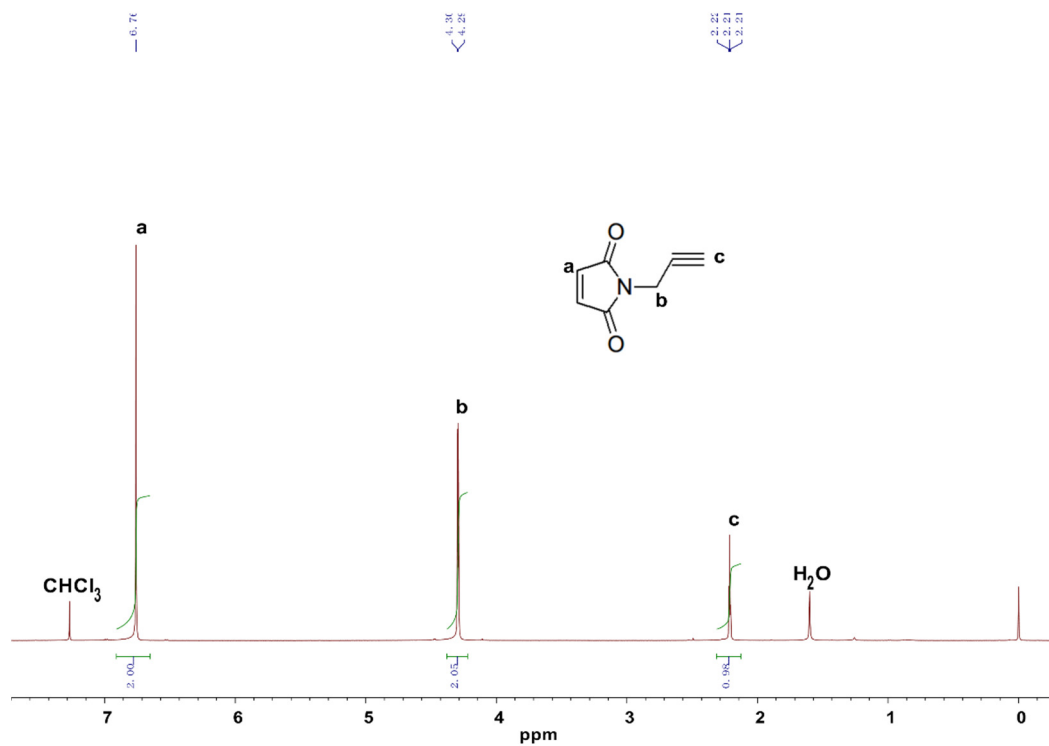

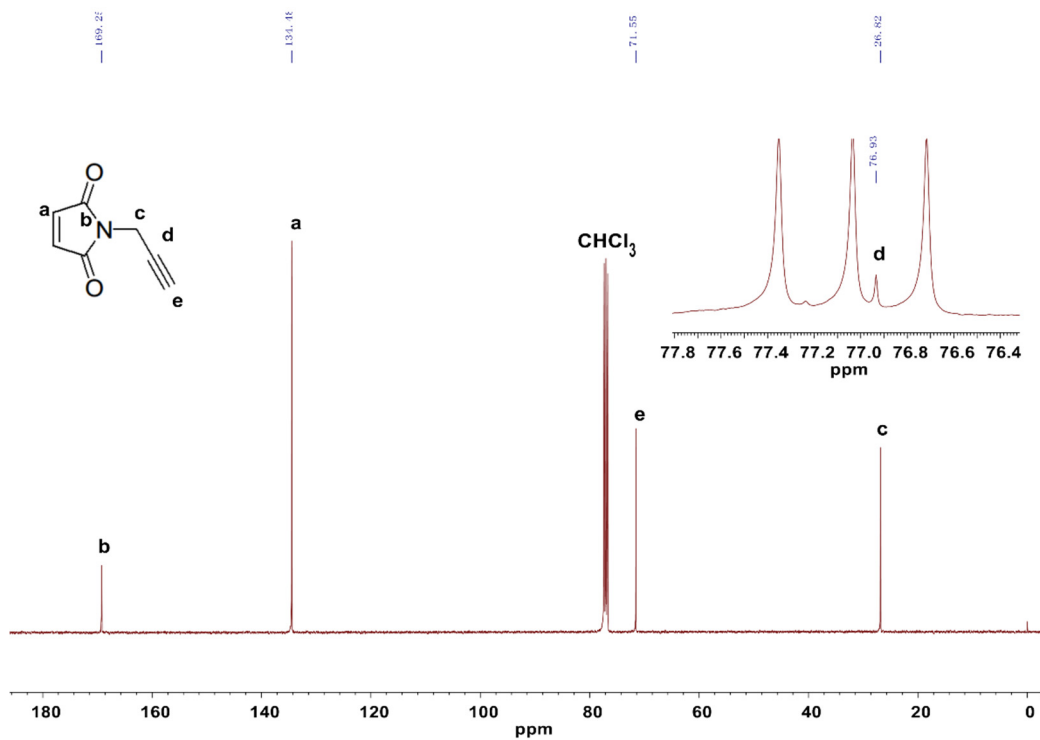

**Figure S4.** <sup>1</sup>H and <sup>13</sup>C NMR spectra of *N*-propargylmaleimide in CDCl<sub>3</sub>.

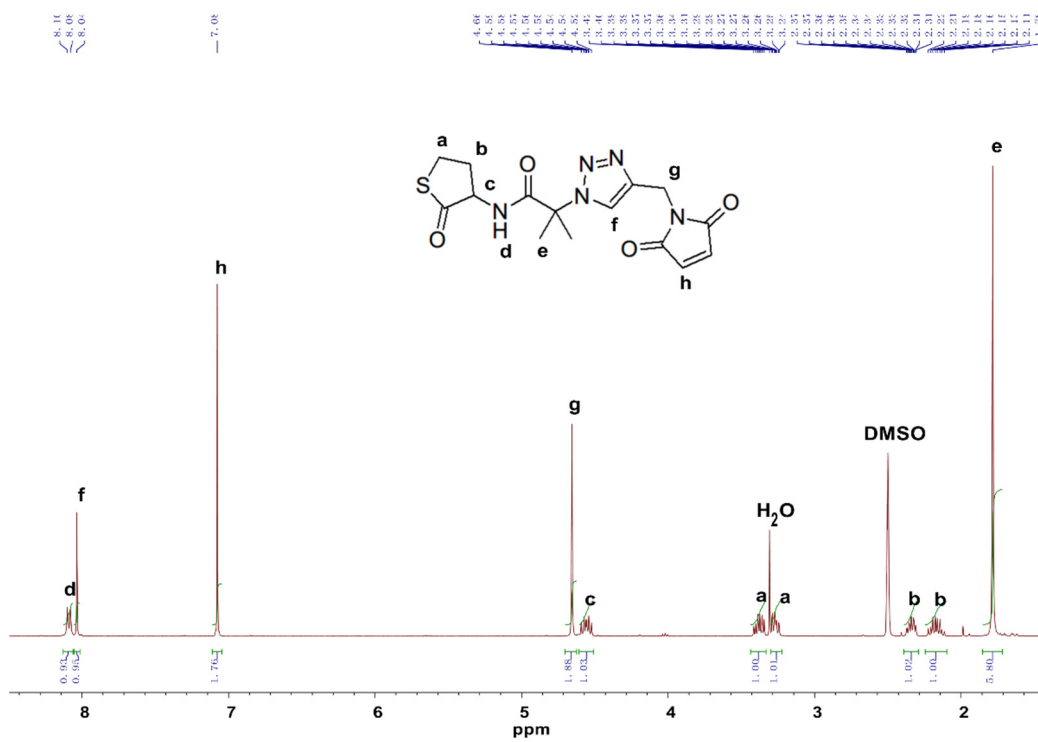

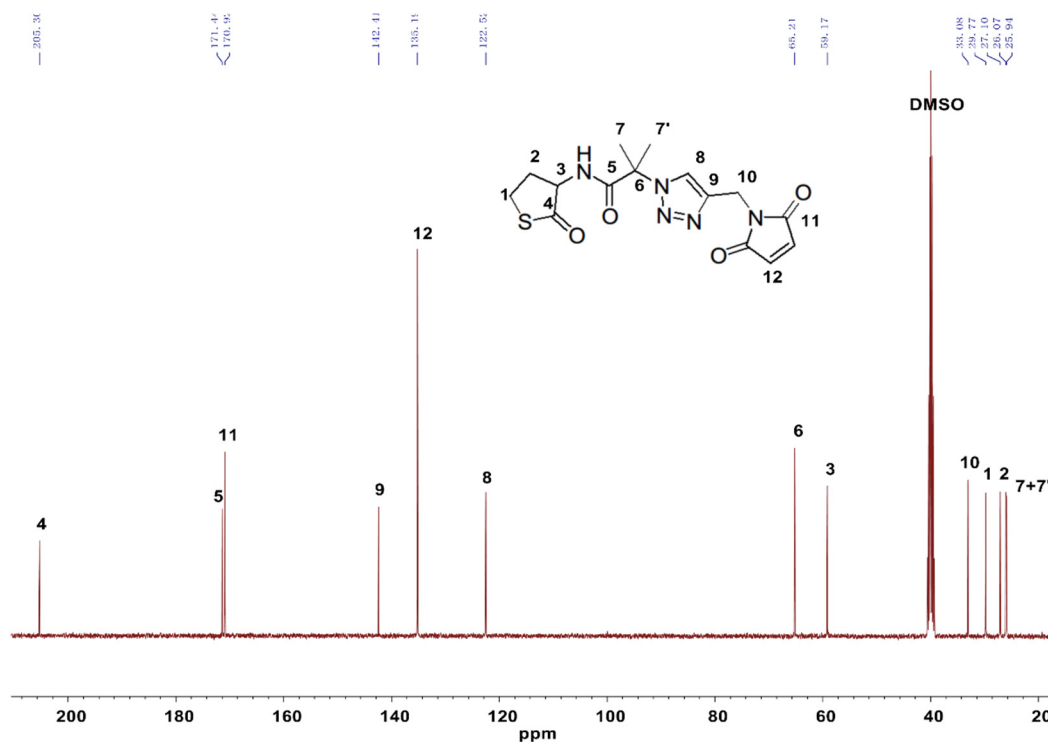

**Figure S5.** <sup>1</sup>H and <sup>13</sup>C NMR spectra of thiolactone-momaleimide monomer in DMSO-*d*<sub>6</sub>.

**Polymerization of thiolactone-maleimide and monoamine.** Thiolactone-maleimide functional monomer (36.3 mg, 0.1 mmol) was dissolved in 1.0 mL DMSO and the solution was purged with argon for 10 min. Then, *n*-butylamine (7.3 mg, 0.1 mmol) was added, and the mixture immediately turned from slight yellow to deep red. The reaction was monitored by <sup>1</sup>H and <sup>13</sup>C NMR spectroscopy.

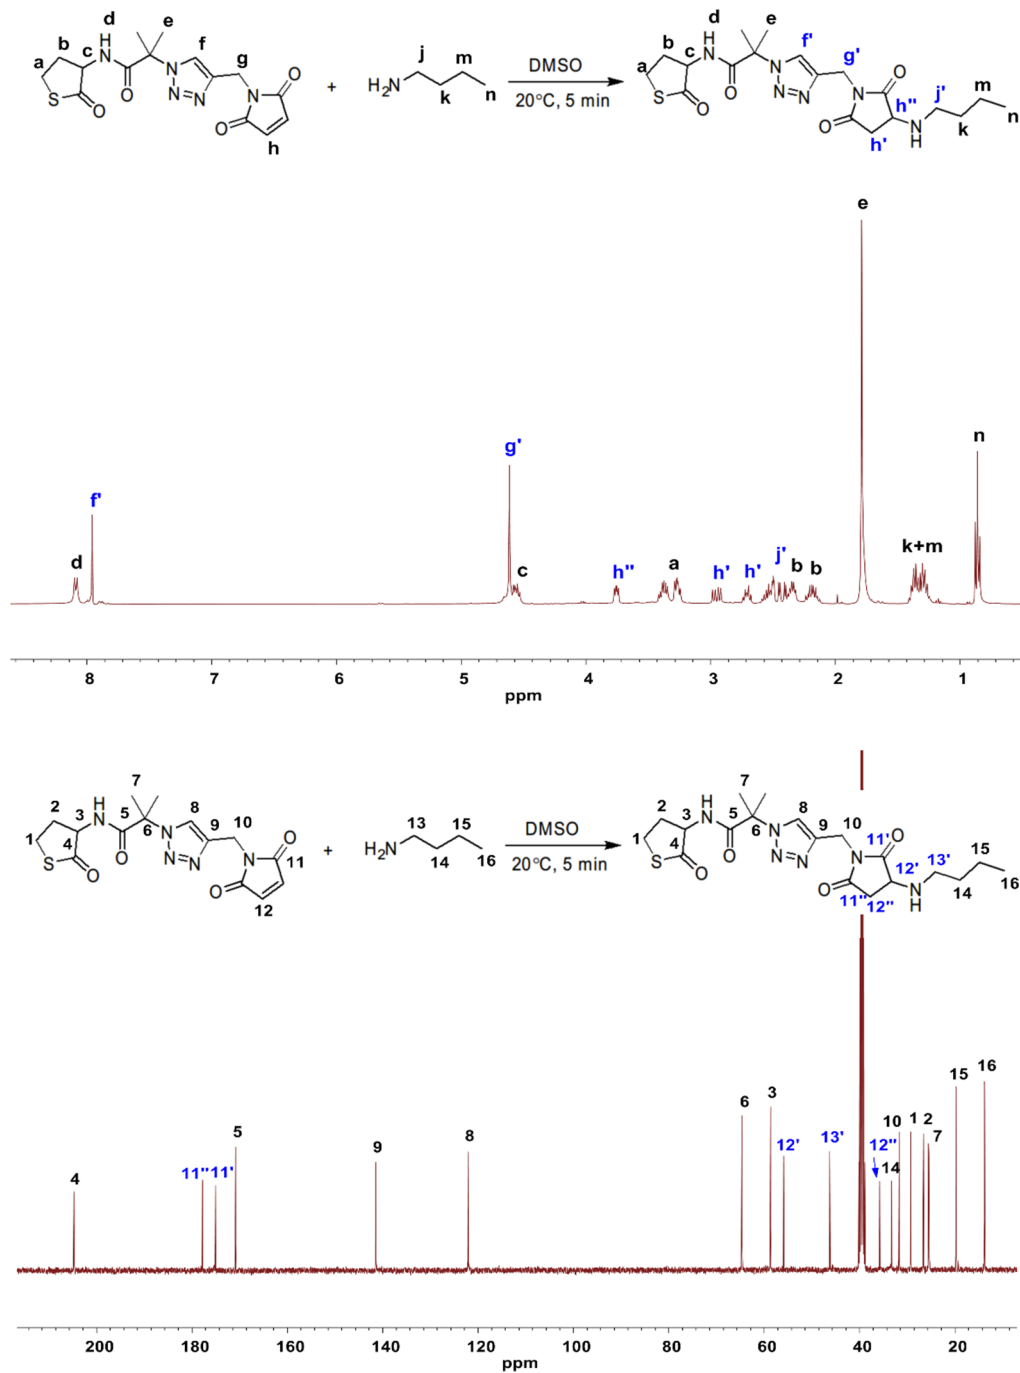

**Figure S6.** <sup>1</sup>H and <sup>13</sup>C NMR spectra of reaction between thiolactone-momaleimide monomer and *n*-butylamine.

As shown in Figure S6, *n*-butylamine selectively and quantitatively reacted with maleimide unit and obtained complete conversion within 5 min, while no ring-opening reaction of thiolactone unit was detected. Also, no additional new carbon signals were observed in  $^{13}\text{C}$  NMR spectrum except the carbons of the product, precluding the possible by-product from the Michael addition between the formed secondary amine and the maleimide unit.

**Polymerization of thiolactone-maleimide and diamine.** Thiolactone-maleimide functional monomer (36.3 mg, 0.1 mmol) was dissolved in 1.0 mL DMSO and the solution was purged with argon for 10 min. Then, 1,3-diaminopropane (7.4 mg, 0.1 mmol) was added, and the mixture gradually turned from yellow to orange red. The mixture was stirred at room temperature and the reaction was monitored by  $^1\text{H}$  NMR and  $^{13}\text{C}$  NMR. After the polymerization, the product was purified by precipitating to acetone twice, and the product was vacuum dried at  $35^\circ\text{C}$  for 3 h. Yield: 94.2%.

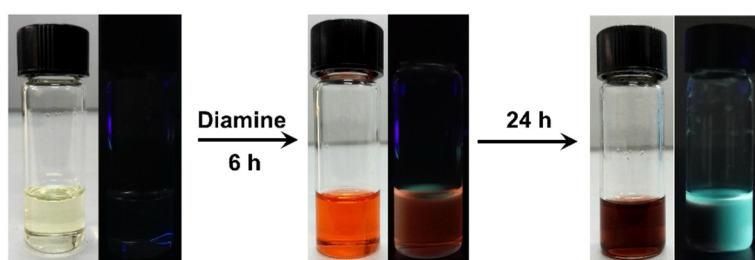

**Figure S7.** Optical change of PAI1 during synthesis.



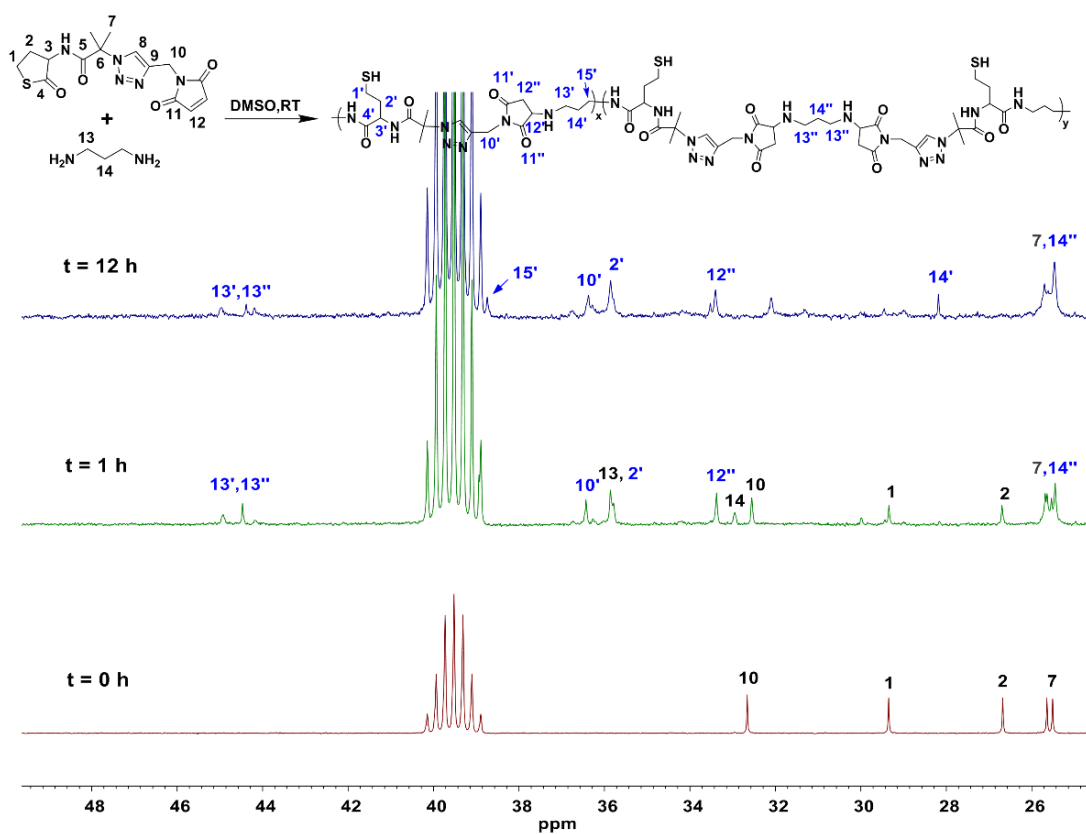

**Figure S8.** Enlarged  $^{13}\text{C}$  NMR spectra between 24 and 50 ppm (complete spectra, see Figure 1B) for the polymerization of thiolactone-maleimide and 1,3-diaminopropane.

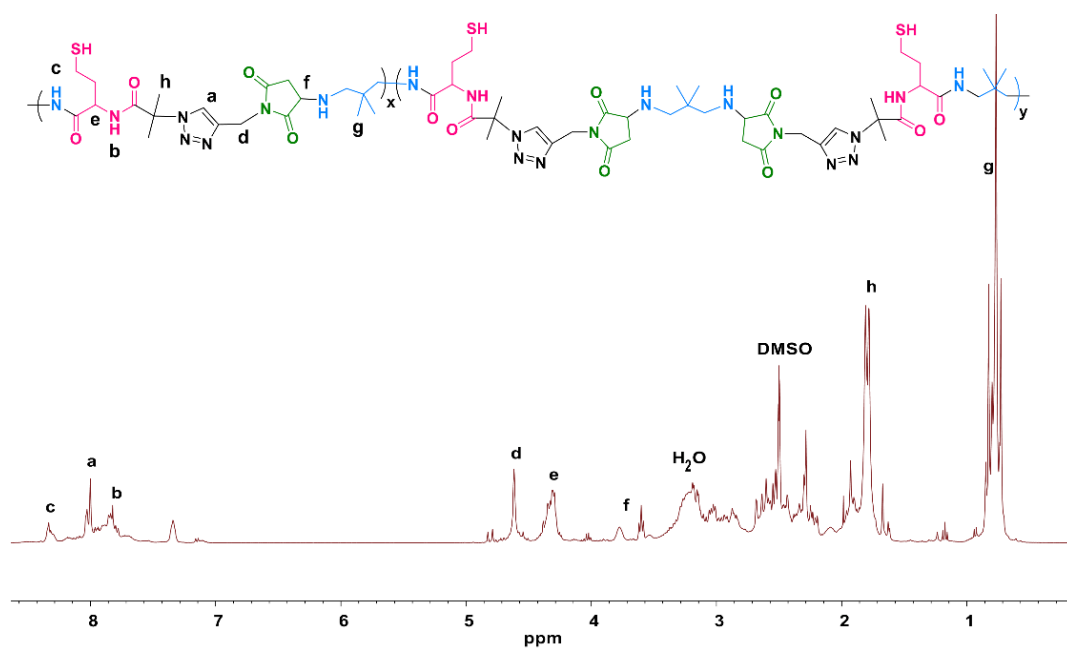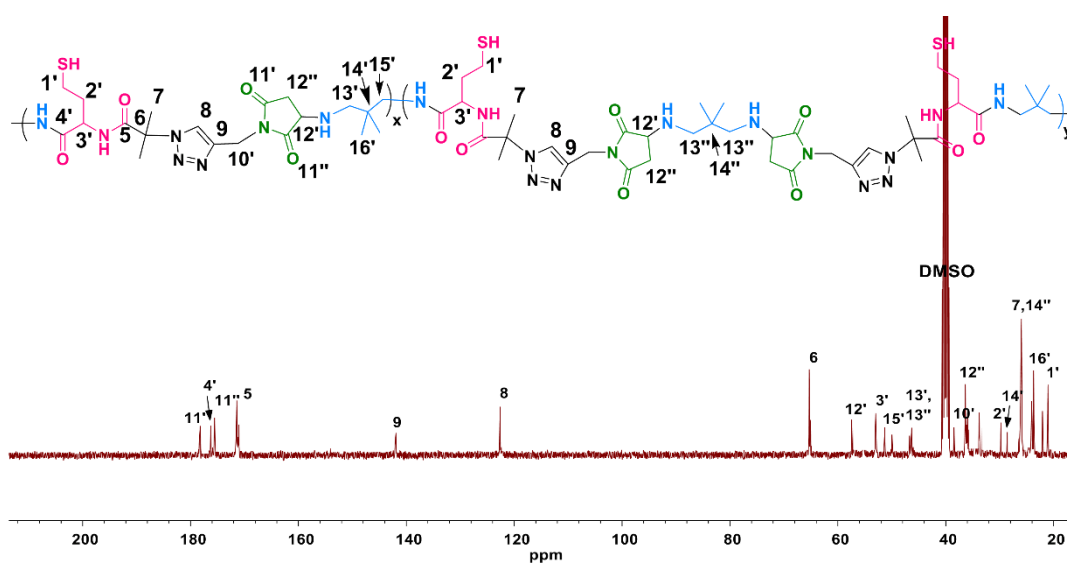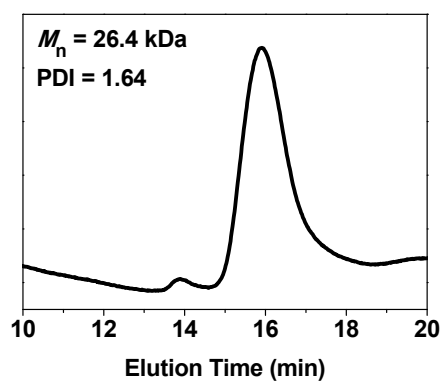

Figure S9.  $^1\text{H}$ ,  $^{13}\text{C}$  NMR spectra and GPC curve of PAI2.

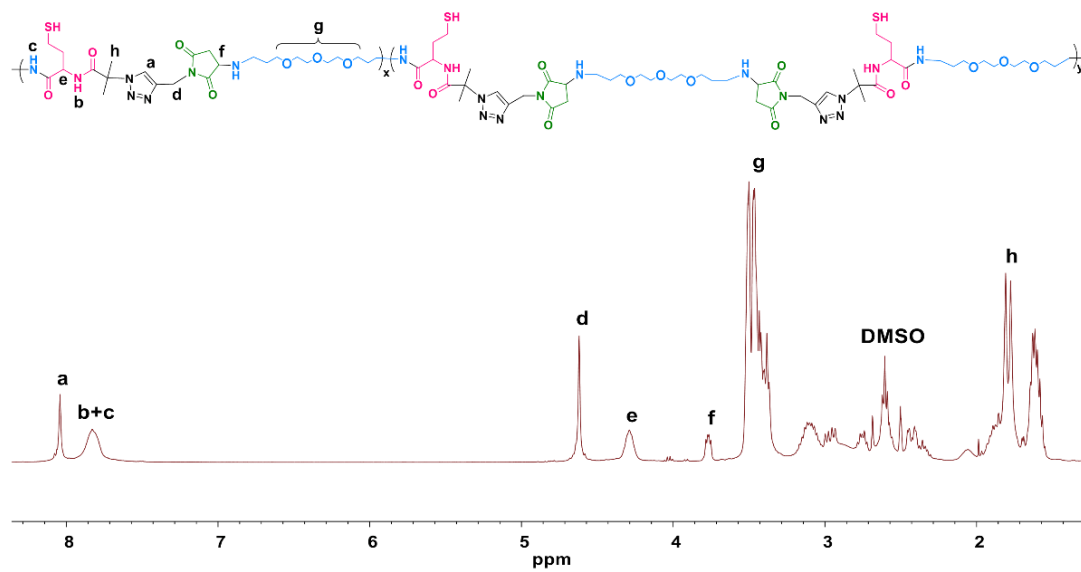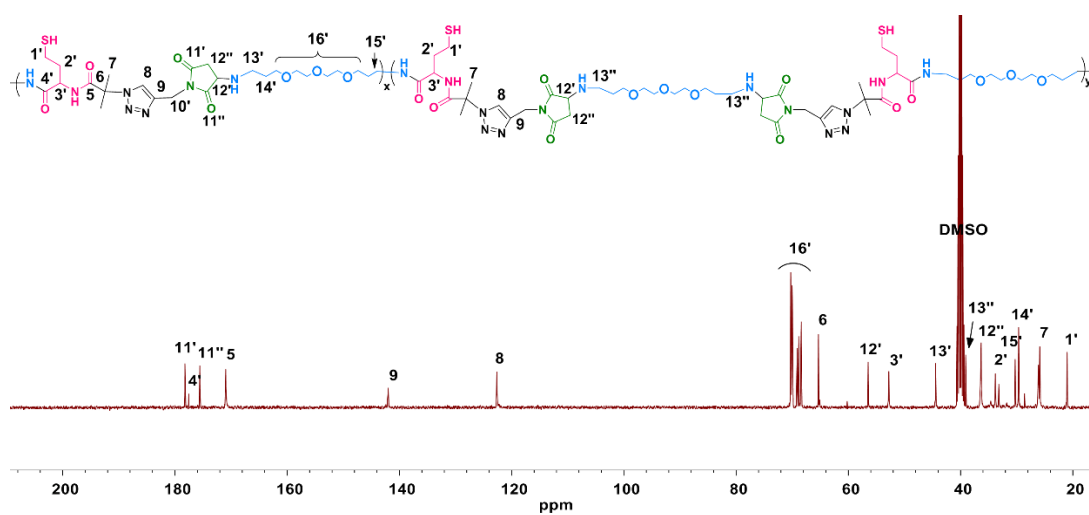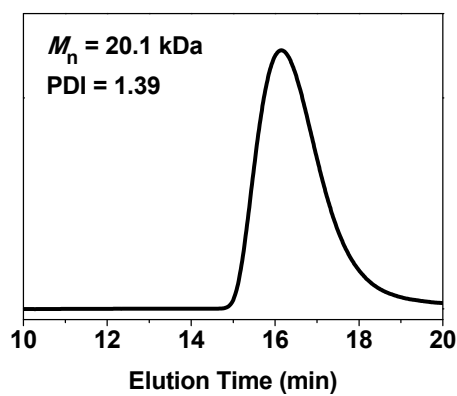

**Figure S10.** <sup>1</sup>H, <sup>13</sup>C NMR spectra and GPC curve of PAI3.

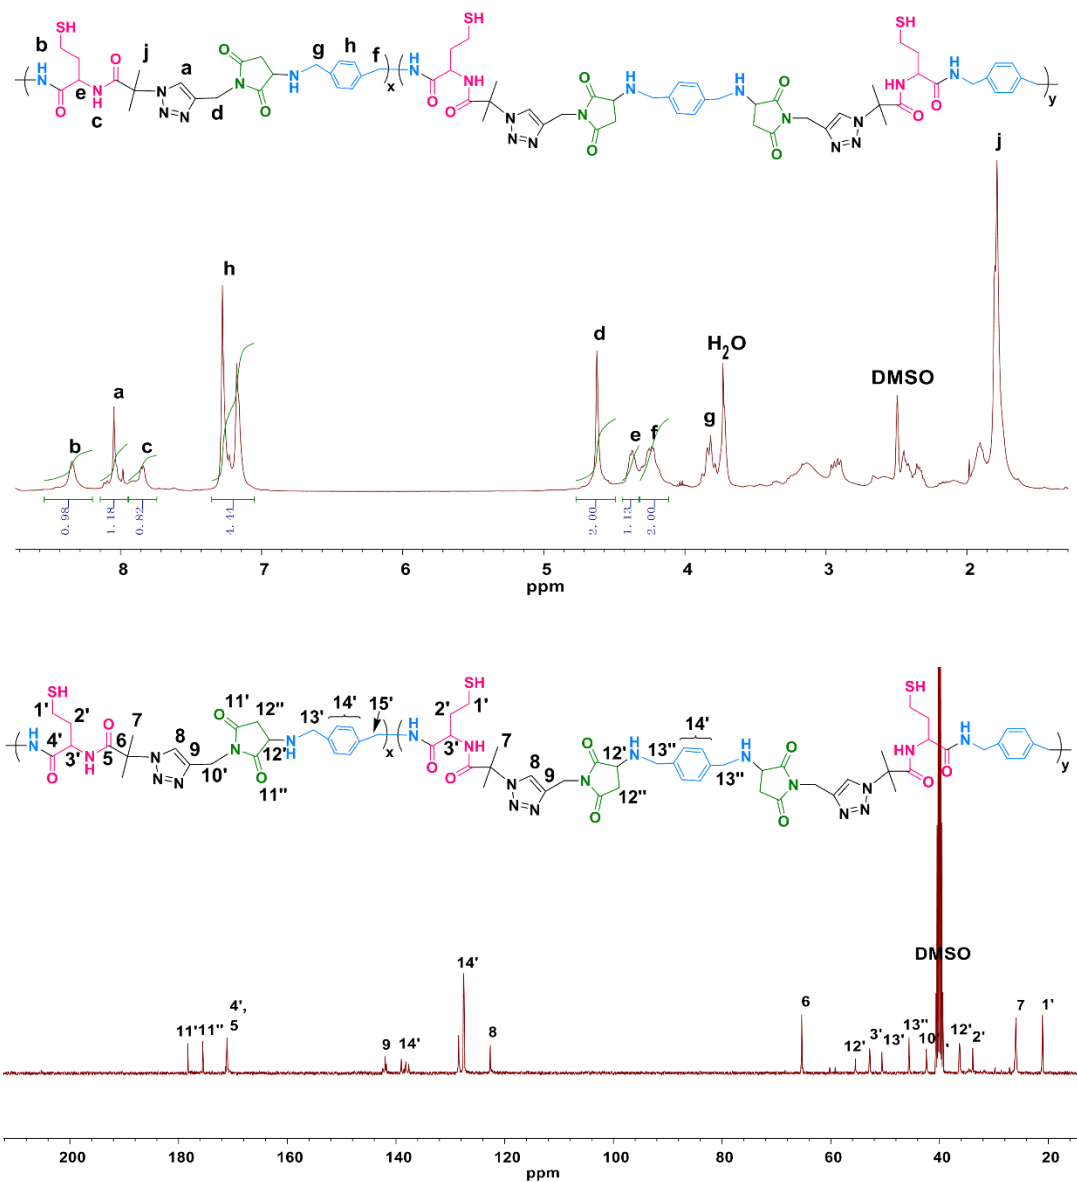

Figure S11. <sup>1</sup>H, <sup>13</sup>C NMR spectra and GPC curve of PAI4.

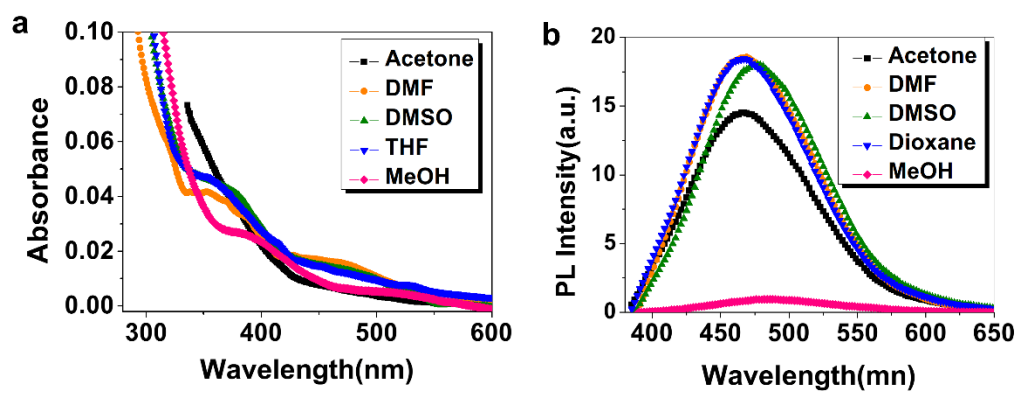

**Figure S12.** UV-vis (a) and fluorescence spectra (b) of PEGylated PAI1 in different solvents.
